# Supplementary material
Source: PubMed Central journal article supplement (PMC3362121)

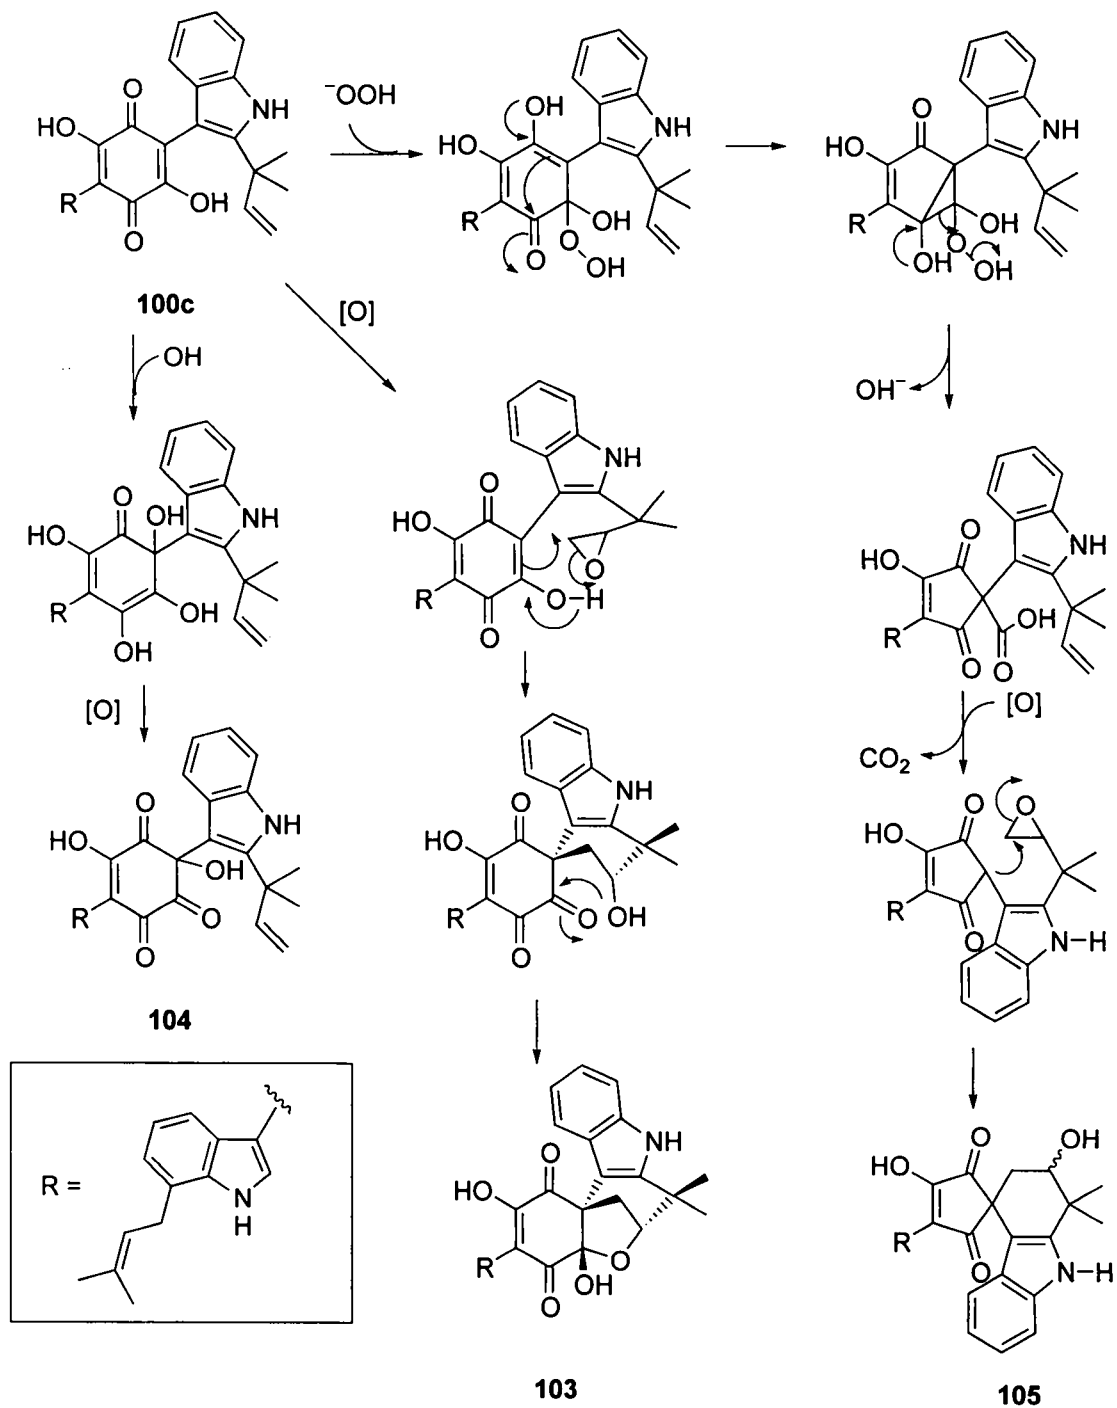

**Figure S1.** Possible biosynthetic pathways to *Pseudomassaria* metabolites 103, 104, and 105 from DMAQ-B1 (100c).

Supplement: NIHMS64863-supplement-1_s.pdf [file NIHMS64863-supplement-1_s.pdf]
